# Supplementary material for: Determination of benzene polycarboxylic acids in atmospheric aerosols and vehicular emissions by liquid chromatography-mass spectrometry
Source: Royal Society of Chemistry journal article supplement (doi:10.1039/b9ay00106a), 2009-11-25
Supplement: b9ay00106a.pdf [file b9ay00106a.pdf]

Supplementary Material (ESI) for Analytical Methods  
This journal is (C) The Royal Society of Chemistry 2009

**Determination of benzene polycarboxylic acids in atmospheric aerosols  
and vehicular emissions by liquid chromatography-mass spectrometry**

**Mahmoud Mohammad Yassine and Ewa Dabek-Zlotorzynska\***

Analysis and Air Quality Section, Air Quality Research Division, Atmospheric Science  
and Technology Directorate, Science and Technology Branch, Environment Canada, 335  
River Road, Ottawa, ON K1A 0H3 Canada

\* Correspondence: Dr. Ewa Dabek-Zlotorzynska, **e-mail:** [ewa.dabek@ec.gc.ca](mailto:ewa.dabek@ec.gc.ca); **Fax:** +  
613-990-8568

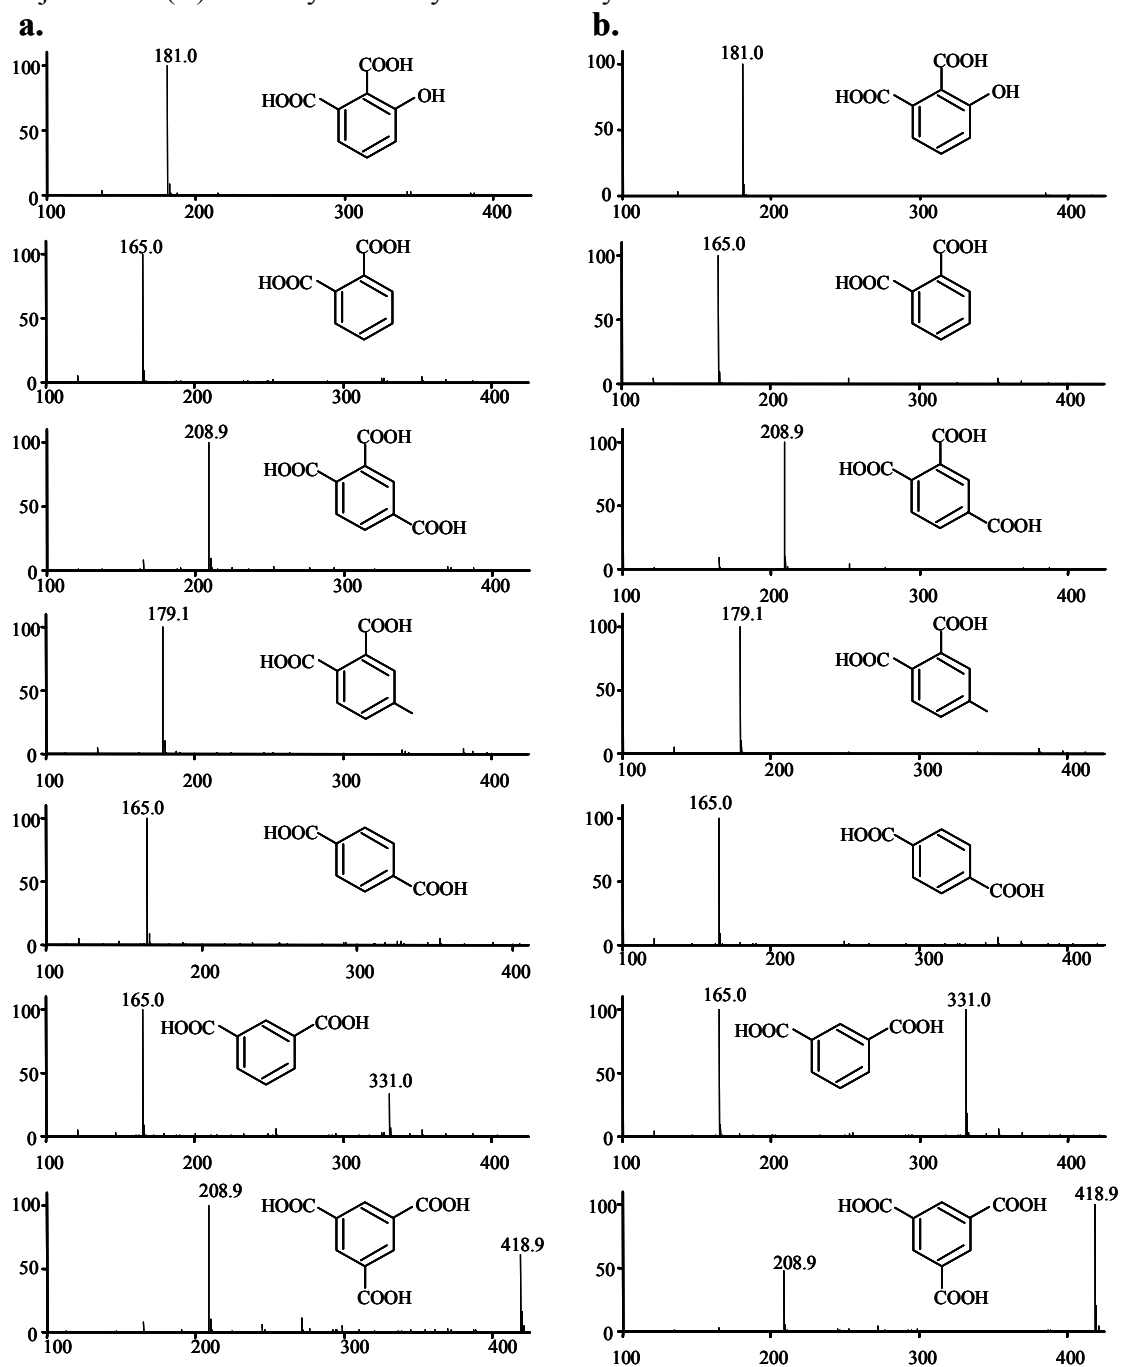

Figure S-1:

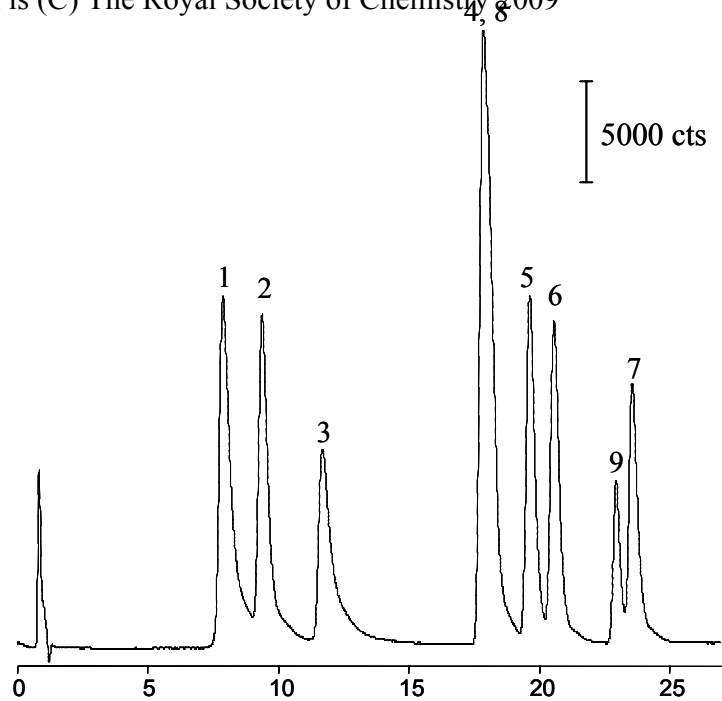

Figure S-2:

**Figure S-1:** ESI-MS spectra of the standard analytes at concentration of (a) 5000  $\mu\text{g/L}$  and (b) 10000  $\mu\text{g/L}$ . **LC conditions:** Column: Zorbax SB-Aq,  $150 \times 2.1$  mm i.d., 3.5  $\mu\text{m}$  particle size; mobile phase: aqueous 0.1% (v/v) formic acid (eluent A) and methanol (eluent B) delivered at flow rate of 0.4 mL/min; elution profile: isocratic step at 2.5% eluent B for 1 min followed by linear gradient step at a slope of 1.63% eluent B per min for 26 min; injection volume: 40  $\mu\text{L}$ . **MS conditions:** Drying gas: 12 L/min at 350°C; Nebulization pressure: 35 psi; Capillary voltage: -2000 V (negative mode); Fragmentor voltage: 50 V; Scan mode (m/z between 100-300).

**Figure S-2:** Separation of a model solution of seven benzene polycarboxylic acids and two monoterpene oxidation products at a concentration of 50  $\mu\text{g/L}$  using LC-ESI(-)/MS in SIM mode programmed to monitor masses: 165, 179, 181, 183, 185, and 209; **Peaks:** (1) 3-hydroxyphthalic acid; (2) phthalic acid; (3) trimellitic acid; (4) 4-methylphthalic acid; (5) *p*-phthalic acid; (6) *m*-phthalic acid; (7) trimesic acid; (8) pinic acid; and (9) pinonic acid. Other conditions are the same as in Figure S-1.
